# Supplementary material for: Novel Lipids to Regulate Obesity and Brain Function: Comparing Available Evidence and Insights from QSAR In Silico Models
Source: MDPI journal article supplement (doi:10.3390/foods12132576), 2023-07-01
Supplement: s1 [file s1]

**Table S1.** Tocopherol content of various plant food sources.

| Food source   | $\alpha$ -Tocopherol<br>(mg/100 g) | $\beta$ -Tocopherol<br>(mg/100 g) | $\gamma$ -Tocopherol<br>(mg/100 g) | $\delta$ -Tocopherol<br>(mg/100 g) |
|---------------|------------------------------------|-----------------------------------|------------------------------------|------------------------------------|
| Apricot oil   | 1.3 - 3.1                          | -                                 | 66.4 - 81.0                        | 1.7 - 2.5                          |
| Hemp seed oil | 3.1                                | -                                 | 60                                 | 3                                  |
| Safflower oil | 57 - 130                           | -                                 | 1.4 - 2.6                          | 0 - 0.70                           |
| Sunflower oil | 51                                 | -                                 | 2.2                                | 0.5                                |
| Almond        | 22 - 30                            | -                                 | -                                  | -                                  |
| Hazelnut raw  | 26 - 32                            | -                                 | 2.3 - 3.9                          | 0.2 - 0.4                          |
| Peanut        | 7.4 - 13                           | 0.2 - 0.5                         | 8.7 - 23                           | 0.4 - 1                            |
| Walnut        | 2.8 - 4                            | -                                 | 16 - 31                            | 1.7 - 4                            |

Contents according to Zaaboul et al. [68]

**Table S2.** Identification of the studied molecules.

| Name                             | SMILES                                                                                                 |
|----------------------------------|--------------------------------------------------------------------------------------------------------|
| Ergosterol                       | <chem>C[C@H](/C=C/[C@H](C)C(C)C)[C@H]1CC[C@@H]2[C@@]1(CC[C@H]3C2=CC=C4[C@@]3(CC[C@@H](C4)O)C)C</chem>  |
| Octacosanol                      | <chem>CCCCCCCCCCCCCCCCCCCCCCCCCCCCCCCCCO</chem>                                                        |
| N-Palmitoylsphingomyelin         | <chem>[H][C@](/C=C/CCCCCCCCCCCCC)(O)[C@@]([H])(NC(CCCCCCCCCCCCCC)=O)COP([O-])(OCC[N+](C)(C)C)=O</chem> |
| $\alpha$ -Tocopherol (Vitamin E) | <chem>CC1=C(C2=C(CC[C@@](O2)(C)CCC[C@H](C)CCC[C@H](C)CCCC(C)C)C(=C1O)C)C</chem>                        |
| Phosphatidylcholine(16:0/20:5)   | <chem>CCCCCCCCCCCCCCCC(=O)OCC(COP(=O)([O-])OCC[N+](C)(C)C)OC(=O)CCCC=CCC=CCC=CCC=CCC=CCC</chem>        |
| Phosphatidylcholine (16:0/22:6)  | <chem>CCCCCCCCCCCCCCCC(=O)OCC(COP(=O)([O-])OCC[N+](C)(C)C)OC(=O)CCC=CCC=CCC=CCC=CCC=CCC=CCC</chem>     |
| Butyrate                         | <chem>CCCC(=O)O</chem>                                                                                 |
| Sodium Butyrate                  | <chem>CCCC(=O)[O-].[Na+]</chem>                                                                        |

**Table S3.** Druglikeness results for Ergosterol, Octacosanol and N-Palmitoylsphingomyelin.

| Druglikeness Parameters                   | Ergosterol              | Octacosanol                               | N-Palmitoylsphingomyelin                  |
|-------------------------------------------|-------------------------|-------------------------------------------|-------------------------------------------|
| Lipinski (# violations; which)            | 1 (MlogP)               | 1 (MlogP)                                 | 1 (MW)                                    |
| Lipinski Acceptance                       | Yes                     | Yes                                       | Yes                                       |
| Ghose (# violations; which)               | 2 (WlogP; MR)           | 3 (WlogP; # Atoms; MR)                    | 4 (MW; WlogP; # Atoms; MR)                |
| Ghose Acceptance                          | No                      | No                                        | No                                        |
| Veber (# violations; which)               | 0                       | 1 (#Rotatable Bonds)                      | 1 (#Rotatable Bonds)                      |
| Veber Acceptance                          | Yes                     | No                                        | No                                        |
| Egan (# violations; which)                | 1 (WlogP)               | 1 (WlogP)                                 | 1 (WlogP)                                 |
| Egan Acceptance                           | No                      | No                                        | No                                        |
| Muegge (# violations; which)              | 2 (XlogP; #Heteroatoms) | 3 (XlogP; #Heteroatoms; #Rotatable Bonds) | 3 (XlogP; #Heteroatoms; #Rotatable Bonds) |
| Muegge Acceptance                         | No                      | No                                        | No                                        |
| Leadlikeness (# violations; which)        | 2 (MW; XlogP)           | 3 (MW; XlogP; #Rotatable Bonds)           | 3 (MW; XlogP; #Rotatable Bonds)           |
| Leadlikeness Acceptance                   | No                      | No                                        | No                                        |
| Bioavailability score                     | 0.55                    | 0.55                                      | 0.55                                      |
| Synthetic accessibility score (SAscore)   | 4.63                    | 1.49 <sup>bc</sup> / 3.72 <sup>a</sup>    | 4.24 <sup>b</sup> / 7.82 <sup>a</sup>     |
| Natural product-likeness score (Npscore)  | 3.04                    | 0.26                                      | 0.66                                      |
| Fsp3                                      | 0.79                    | 1                                         | 0.92                                      |
| Brenk (Structural alert)                  | 1                       | 0                                         | 3                                         |
| Medicinal Chemistry Evaluation (MCE-18)   | 68.04                   | 0                                         | 9                                         |
| PAINS (Pan Assay Interference compounds)  | 0                       | 0                                         | 0                                         |
| Alarm NMR Rule (Thiol reactive compounds) | 0                       | 0                                         | 0                                         |
| BMS Rule (Reactive compounds)             | 0                       | 1                                         | 1                                         |
| Chelator Rule (Chelating compounds)       | 0                       | 0                                         | 0                                         |
| QED (Desirability)                        | 0.49                    | 0.14                                      | 0.03                                      |

a - <http://www.swissadme.ch/>; b - <https://admetmesh.scbdd.com/>; c - <https://bidd.group/NPASS/index.php>

**Table S4.** Druglikeness results for  $\alpha$ -Tocopherol, Phosphatidylcholines (16:0/20:5) and (16:0/22:6), Butyrate and Sodium Butyrate.

| Druglikeness Parameters                   | $\alpha$ -Tocopherol (Vitamin E)       | Phosphatidylcholine (16:0/20:5) | Phosphatidylcholine (16:0/22:6) | Butyrate                            | Sodium Butyrate                    |
|-------------------------------------------|----------------------------------------|---------------------------------|---------------------------------|-------------------------------------|------------------------------------|
| Lipinski (# violations; which)            | 1 (MlogP)                              | 1 (MW)                          | 1 (MW)                          | 0                                   | 0                                  |
| Lipinski Acceptance                       | Yes                                    | Yes                             | Yes                             | Yes                                 | Yes                                |
| Ghose (# violations; which)               | 2 (WlogP; MR)                          | 3 (MW; #Atoms; MR)              | 3 (MW; #Atoms; MR)              | 3 (MW; #Atoms; MR)                  | 4 (MW; WlogP; #Atoms; MR)          |
| Ghose Acceptance                          | No                                     | No                              | No                              | No                                  | No                                 |
| Veber (# violations; which)               | 1 (#Rotatable Bonds)                   | 1 (#Rotatable Bonds)            | 1 (#Rotatable Bonds)            | 0                                   | 0                                  |
| Veber Acceptance                          | No                                     | No                              | No                              | Yes                                 | Yes                                |
| Egan (# violations; which)                | 1 (WlogP)                              | 1 (WlogP)                       | 1 (WlogP)                       | 0                                   | 0                                  |
| Egan Acceptance                           | No                                     | No                              | No                              | Yes                                 | Yes                                |
| Muegge (# violations; which)              | 1 (XlogP)                              | 3 (MW; XlogP; #Rotatable Bonds) | 3 (MW; XlogP; #Rotatable Bonds) | 2 (MW; #Carbons)                    | 2 (MW; #Carbons)                   |
| Muegge Acceptance                         | No                                     | No                              | No                              | No                                  | No                                 |
| Leadlikeness (# violations; which)        | 3 (MW; XlogP; #Rotatable Bonds)        | 3 (MW; XlogP; #Rotatable Bonds) | 3 (MW; XlogP; #Rotatable Bonds) | 1 (MW)                              | 1 (MW)                             |
| Leadlikeness Acceptance                   | No                                     | No                              | No                              | No                                  | No                                 |
| Bioavailability score                     | 0.55                                   | ---                             | ---                             | 0.85                                | 0.55                               |
| Synthetic accessibility score (SAscore)   | 3.78 <sup>a</sup> / 5.17 <sup>bc</sup> | 4.58                            | 4.71                            | 1 <sup>a</sup> / 1.74 <sup>bc</sup> | 1 <sup>a</sup> / 3.42 <sup>b</sup> |
| Natural product-likeness score (Npscore)  | 1.50                                   | 0.81                            | 0.80                            | ---                                 | -0.20                              |
| Fsp3                                      | 0.79                                   | 0.73                            | 0.70                            | 0.75                                | 0.75                               |
| Brenk (Structural alert)                  | 0                                      | 0                               | 0                               | 0                                   | 0                                  |
| Medicinal Chemistry Evaluation (MCE-18)   | 56.08                                  | 9                               | 9                               | 0                                   | 0                                  |
| PAINS (Pan Assay Interference compounds)  | 0                                      | 0                               | 0                               | 0                                   | 0                                  |
| Alarm NMR Rule (Thiol reactive compounds) | 1                                      | 0                               | 0                               | 0                                   | 0                                  |
| BMS Rule (reactive compounds)             | 1                                      | 1                               | 1                               | 0                                   | 0                                  |
| Chelator Rule (chelating compounds)       | 0                                      | 0                               | 0                               | 0                                   | 0                                  |
| QED (Desirability)                        | 0.36                                   | 0.02                            | 0.02                            | 0.54                                | 0.46                               |

a - <http://www.swissadme.ch/>; b - <https://admetmesh.scbdd.com/>; c - <https://bidd.group/NPASS/index.php>

**Table S5.** Target prediction for Ergosterol, Octacosanol and N-Palmitoylsphingomyelin.

| Target Prediction | Ergosterol            |                                                                                                    | Octacosanol                                                                                                                                       |                                                                                                                         | N-Palmitoylsphingomyelin                                                                                                                                                    |                                                                                                                                                                                                 |                                                                                                                                     |
|-------------------|-----------------------|----------------------------------------------------------------------------------------------------|---------------------------------------------------------------------------------------------------------------------------------------------------|-------------------------------------------------------------------------------------------------------------------------|-----------------------------------------------------------------------------------------------------------------------------------------------------------------------------|-------------------------------------------------------------------------------------------------------------------------------------------------------------------------------------------------|-------------------------------------------------------------------------------------------------------------------------------------|
|                   | SwissTargetPrediction | SEA                                                                                                | SwissTargetPrediction                                                                                                                             | SEA                                                                                                                     | SwissTargetPrediction                                                                                                                                                       | SEA                                                                                                                                                                                             |                                                                                                                                     |
| Target_1          | Name                  | Vitamin D receptor (VDR)                                                                           | Delta(24)-sterol reductase (DHCR24)                                                                                                               | Transient receptor potential cation channel subfamily M member 8                                                        | Dynamin-1 (DNM1)                                                                                                                                                            | Lysophosphatidic acid receptor Edg-7 (LPAR3)                                                                                                                                                    | Lysophosphatidic acid receptor Edg-7 (LPAR3)                                                                                        |
|                   | Uniprot ID            | P11473                                                                                             | Q15392                                                                                                                                            | Q7Z2W7                                                                                                                  | Q05193                                                                                                                                                                      | Q9UBY5                                                                                                                                                                                          | Q9UBY5                                                                                                                              |
|                   | Activity              | Nuclear receptor of calcitriol, the active form of vitamin D3                                      | Catalyzes cholesterol biosynthesis; can protect cells from oxidative stress                                                                       | Receptor-activated non-selective cation channel involved in detection of sensations such as coolness (cold temperature) | Involved in vesicular trafficking processes and in receptor-mediated endocytosis                                                                                            | Receptor for lysophosphatidic acid, a mediator of diverse cellular activities. May play a role in the development of ovarian cancer                                                             | Receptor for lysophosphatidic acid, a mediator of diverse cellular activities. May play a role in the development of ovarian cancer |
| Target_2          | Name                  | Protein-tyrosine phosphatase 1B (PTPN1)                                                            | Steroid 17-alpha-hydroxylase/17,20lyase (CYP17A1)                                                                                                 | Carbonic anhydrase II (CA2)                                                                                             | All-trans-retinol dehydrogenase [NAD(+)]ADH7 (ADH7)                                                                                                                         | Phospholipase A2, membrane associated (PLA2G2A)                                                                                                                                                 | Lysophosphatidic acid receptor 4 (LPAR4)                                                                                            |
|                   | Uniprot ID            | P18031                                                                                             | P05093                                                                                                                                            | P00918                                                                                                                  | P40394                                                                                                                                                                      | P14555                                                                                                                                                                                          | Q99677                                                                                                                              |
|                   | Activity              | Acts as a regulator of endoplasmic reticulum unfolded protein response                             | Involved in corticoid and androgenbiosynthesis                                                                                                    | Catalyses the reversible hydration of carbon dioxide                                                                    | Catalyzes the NAD-dependent oxidation of all-trans-retinol, alcohol and omega-hydroxy fatty acids and their derivatives                                                     | Secretory calcium-dependent phospholipase A2 that primarily targets extracellular phospholipids with implications in host antimicrobial defense, inflammatory response and tissue regeneration. | Receptor of LPA, a mediator of diverse cellular activities                                                                          |
| Target_3          | Name                  | Glycine receptor subunit alpha-1 (GLRA1)                                                           | NPC1-like intracellular cholesterol transporter 1 (NPC1L1)                                                                                        | Carbonic anhydrase I (CA1)                                                                                              | Geranylgeranyl pyrophosphate synthase (GGPS1)                                                                                                                               | Phospholipase A2 group 1B (PLA2G1B)                                                                                                                                                             | Toll-like receptor 2 (TLR2)                                                                                                         |
|                   | Uniprot ID            | P23415                                                                                             | Q9UHC9                                                                                                                                            | P00915                                                                                                                  | O95749                                                                                                                                                                      | P04054                                                                                                                                                                                          | O60603                                                                                                                              |
|                   | Activity              | Play a major role in mediating fast inhibitory neurotransmission in the spinal cord and brain stem | Is the direct molecular target of ezetimibe, a drug that inhibits cholesterol absortion and is approved for the treatment of hypercholesterolemia | Catalyses the reversible hydration of carbon dioxide                                                                    | Catalyzes the trans-addition of the three molecules of IPP onto DMAPP to form geranylgeranyl pyrophosphate, an important precursor of carotenoids and geranylated proteins. | Secretory calcium-dependent phospholipase A2 that primarily targets dietary phospholipids in the intestinal tract                                                                               | Cooperates with LY96 to mediate the innate immune response to bacterial lipoproteins and other microbial cell wall components       |

**Table S6.** Target prediction  $\alpha$ -Tocopherol, Phosphatidylcholines (16:0/20:5) and (16:0/22:6), Butyrate and Sodium Butyrate.

| Target Prediction |            | $\alpha$ -Tocopherol (Vitamin E)                                                                    |                                                                                                                             | Phosphatidylcholines (16:0/20:5) and (16:0/22:6)                                                                           |                                                                                                               | Butyrate                                             |                                                                                    | Sodium Butyrate                                                                                 |
|-------------------|------------|-----------------------------------------------------------------------------------------------------|-----------------------------------------------------------------------------------------------------------------------------|----------------------------------------------------------------------------------------------------------------------------|---------------------------------------------------------------------------------------------------------------|------------------------------------------------------|------------------------------------------------------------------------------------|-------------------------------------------------------------------------------------------------|
|                   |            | SwissTargetPrediction                                                                               | SEA                                                                                                                         | SwissTargetPrediction                                                                                                      | SEA                                                                                                           | SwissTargetPrediction                                | SEA                                                                                | SEA                                                                                             |
| Target_1          | Name       | PH domain leucine-rich repeat-containing protein phosphatase 1 (PHLPP1)                             | <b>Alpha-tocopherol transfer protein (TTPA)</b>                                                                             | P-selectin (SELP)                                                                                                          | Lysophosphatidic acid receptor 4 (LPAR4)                                                                      | <b>Histone deacetylase 3 (HDAC 3)</b>                | Gamma-butyrobetaine dioxygenase (BBOX1)                                            | Cocaine Esterase (CES2)                                                                         |
|                   | Uniprot ID | O60346                                                                                              | P49638                                                                                                                      | P16109                                                                                                                     | Q99677                                                                                                        | O15379                                               | O75936                                                                             | O00748                                                                                          |
|                   | Activity   | Inhibits cancer cell proliferation and may act as a tumor suppressor                                | <b>Binds alpha-tocopherol, enhances its transfer between separate membranes and stimulates its release from liver cells</b> | Mediates rapid rolling of leukocyte over vascular surfaces during the initial steps in inflammation                        | Receptor for lysophosphatidic acid (LPA), a mediator for diverse cellular activities                          | <b>Deacetylation of lysine residues</b>              | Catalyzes the formation of L-carnitine from gamma-butyrobetaine                    | Involved in the detoxification of xenobiotics and in the activation of ester and amide prodrugs |
| Target_2          | Name       | Serine/threonine-protein kinase ILK-1 (ILK)                                                         | PH domain leucine-rich repeat-containing protein phosphatase 1 (PHLPP1)                                                     | Platelet activating factor receptor (PTAFR)                                                                                | Lysophosphatidic acid receptor 6 (LPAR6)                                                                      | Egl nine homolog 1 (EGLN1)                           | Histone lysine demethylase PHF8 (PHF8)                                             | Liver carboxylesterase 1 (CES1)                                                                 |
|                   | Uniprot ID | Q13418                                                                                              | O60346                                                                                                                      | P25105                                                                                                                     | P43657                                                                                                        | Q9GZT9                                               | Q9UPP1                                                                             | P23141                                                                                          |
|                   | Activity   | Receptor-proximal protein kinase regulating integrin-mediated signal transduction                   | Inhibits cancer cell proliferation and may act as a tumor suppressor                                                        | A chemotactic phospholipid mediator that possesses potent inflammatory, smooth-muscle contractile and hypotensive activity | Binds to oleoyl-L-alpha-lysophosphatidic acid (LPA); important for the maintenance of hair growth and texture | Cellular oxygen sensor                               | Plays a key role cell cycle progression , rDNA transcription and brain development | Involved in the detoxification of xenobiotics and in the activation of ester and amide prodrugs |
| Target_3          | Name       | Serine/threonine-protein kinase AKT (AKT1)                                                          | Cholinesterase (BCHE)                                                                                                       | Autotaxin (ENPP2)                                                                                                          | Lysophosphatidic acid receptor 2 (LPAR2)                                                                      | <b>GABA transporter 1 (SLC6A1)</b>                   | Lysine-specific demethylase 7A (KDM7A)                                             | Organic Anion transporter 3 (SLC22A8)                                                           |
|                   | Uniprot ID | P31749                                                                                              | P06276                                                                                                                      | Q13822                                                                                                                     | Q9HBW0                                                                                                        | P30531                                               | Q6ZMT4                                                                             | Q8TCC7                                                                                          |
|                   | Activity   | Regulate many processes including metabolism, proliferation, cell survival, growth and angiogenesis | Contributes to the inactivation of the neurotransmitter acetylcholine; can degrade neurotoxic organophosphate esters        | Involved in several motility-related processes such as angiogenesis and neurite outgrowth                                  | Receptor for lysophosphatidic acid (LPA); plays a key role in phospholipase C-beta signaling pathway          | <b>Mediates transport of gamma-aminobutyric acid</b> | Required for brain development                                                     | May participate in the detoxification/ renal excretion of drugs and xenobiotics                 |
